# Supplementary material
Source: PubMed Central journal article supplement (PMC3309777)
Supplement: 1118192109_pnas.1118192109_SI.pdf [file 1118192109_pnas.1118192109_SI.pdf]

# Supporting Information

Osz et al. 10.1073/pnas.1118192109

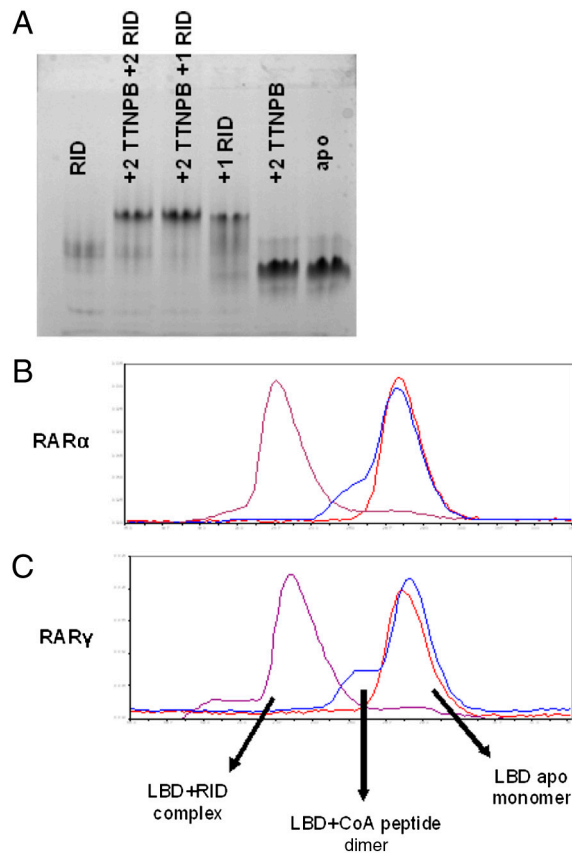

**Fig. S1.** Coactivator bound-RAR $\beta$  LBD forms homodimers in solution. (A) Native PAGE of SRC-1 RID alone (lane 1), RAR $\beta$  LBD with two equivalents of TTNBP and two equivalents of SRC-1 RID (lane 2), RAR $\beta$  LBD with two equivalents of TTNPB and one equivalent of SRC-1 RID (lane 3), RAR $\beta$  LBD with one equivalent of SRC-1 RID (lane 4), RAR $\beta$  LBD with two equivalents of TTNPB (lane 5) and RAR $\beta$  LBD apo (lane 6). (B) Gel filtration profiles of apo RAR $\alpha$  and the TTNPB complexes with SRC-1 NR2 or SRC-1 RID. (C) Gel filtration profiles of apo RAR $\gamma$  and the TTNPB complexes with SRC-1 NR2 or SRC-1 RID.

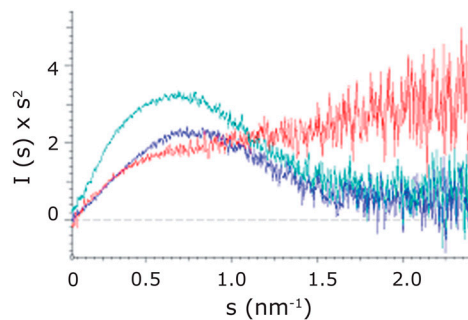

**Fig. S2.** Kratky plot from small angle X-ray scattering results showing the folding of SRC-1 RID upon binding to RAR $\beta$  LBD. SRC-1 RID in red, RAR $\beta$  LBD-SRC-1 NR2 in blue, and RAR $\beta$  LBD-SRC-1 RID complex in cyan.

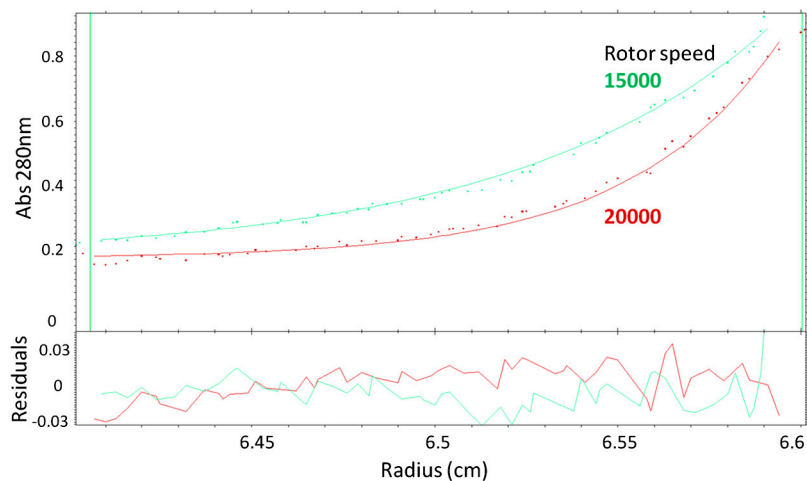

**Fig. S3.** Sedimentation equilibrium experiments. Best fits of experimental data for RAR $\beta$  LBD-TTNPB-SRC-1 RID (4 °C) at 15,000 and 20,000 rpm with the self-association methods (SedPhat program—*Methods*). The random distribution of the residuals (*Bottom*) indicates that the fit is satisfactory. Sedimentation equilibrium data of RAR $\beta$  LBD-TTNPB-SRC-1 RID agree with one SRC-1 RID bound to a homodimer of RAR $\beta$  LBD. (see *Results and Discussion* for details).

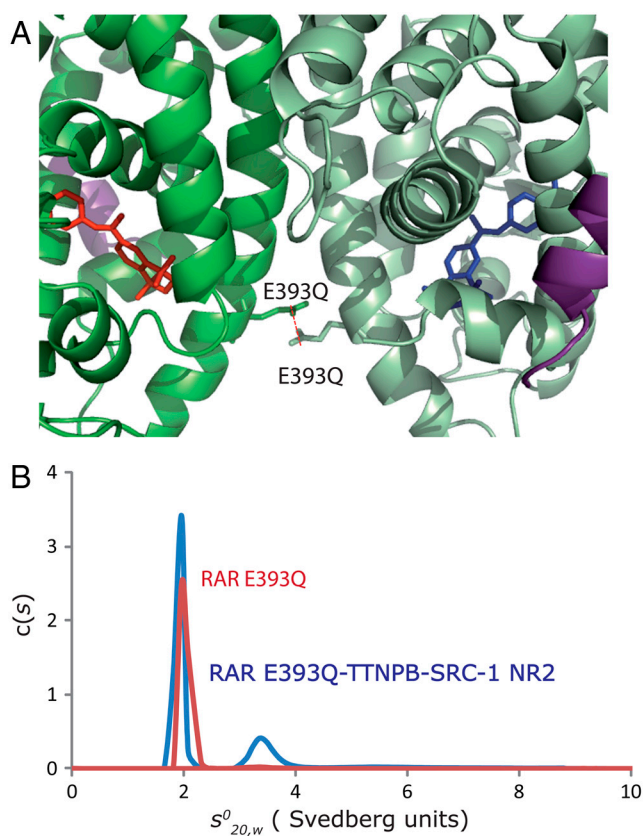

**Fig. S4.** Characterization of RAR E393Q LBD, a residue shown to be important in the dimer communication. (A) Model of RAR $\alpha$  E393Q dimer with Q393 of one monomer interacting with Q393 of the other monomer. (B) Sedimentation velocity analysis for RAR $\alpha$  E393Q LBD apo and its complexes with TTNPB and SRC-1 NR2 peptide by Lamm equation fits using the Sedfit program. The sedimentation distribution plot shows one sedimentation species for the apo RAR $\alpha$  E393Q LBD. In presence of ligand and SRC-1 NR2 peptide, two peaks are observed, one corresponding to the monomer and the second to the dimer.

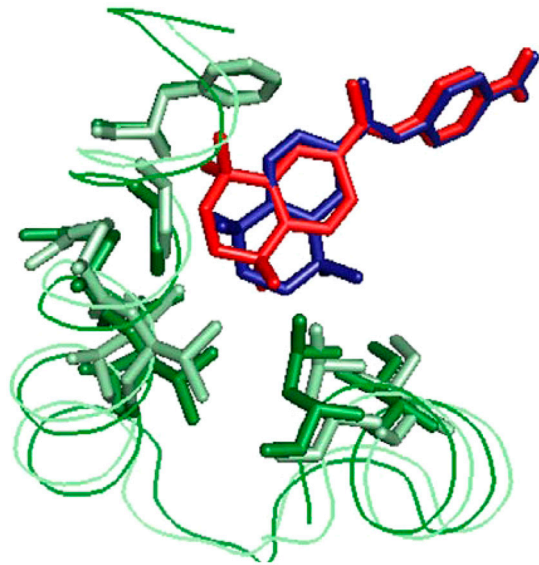

**Fig. S5.** Different conformations of TTNPB ligands in each monomer. Close-up view of the interactions of TTNPB near the tetrahydronaphthalene region, in the ligand binding pockets of M1 (green) and M2 (light green) of the RAR $\beta$  LBD homodimer.

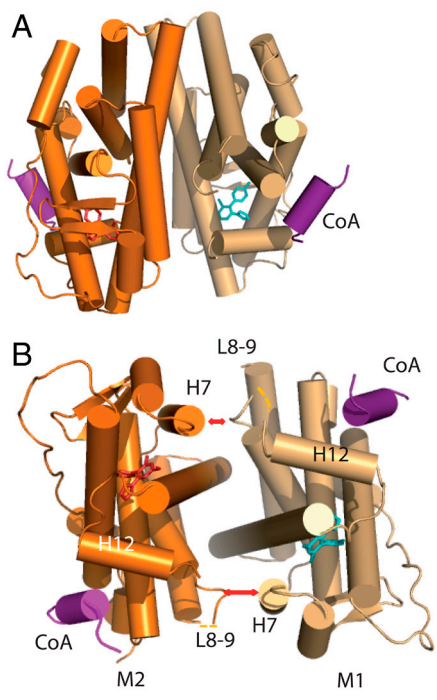

**Fig. S6.** Crystal structure of ER $\beta$  LBD-RU100132-SRC-1 NR2. (A) Overall structure of ER $\alpha$  homodimer. (B) View along the pseudo-twofold axis of the homodimer LBD of hER $\alpha$ . Red arrows highlight the dissymmetrical distances between ER $\alpha$ 's helix H7 and loop L8-9.

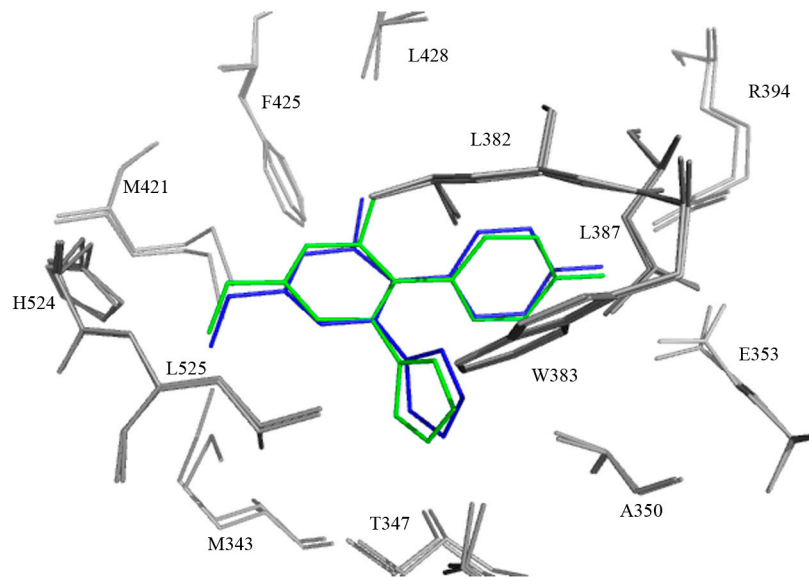

**Fig. S7.** Interactions made by RU100132 ligand in each monomer of the homodimeric hER $\alpha$  LBD. Some differences in the position of the ligands and in their contacts are observed between the two monomers, as for example Arg394 (H5) and its contacts with RU100132 (2.9 Å in one monomer and 3.3 Å in the other).

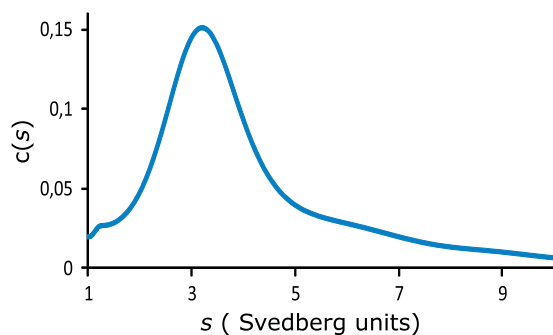

**Fig. S8.** SRC-1 RID coactivator binds ER $\beta$  LBD with a stoichiometry of one coactivator per dimer. Sedimentation velocity analysis for ER $\beta$  LBD in complex with estradiol and SRC-1 RID. The sedimentation distribution plots show one sedimentation specie with the corresponding sedimentation coefficient 3.345 that corresponds to a molecular mass value of 84,500 Da.

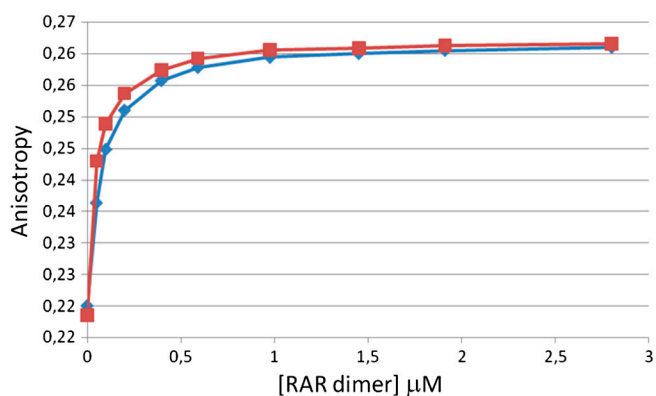

**Fig. S9.** Binding curve of RAR $\alpha$  $\Delta$ AB-RAR $\alpha$  $\Delta$ AB in absence (blue squares) and presence of SRC-1 NR2 peptide (red squares) to the FAM-labeled DR2 DNA. The binding constants to the oligonucleotides were determined from anisotropy titrations with FAM-labeled DR2, as described in *Methods*.

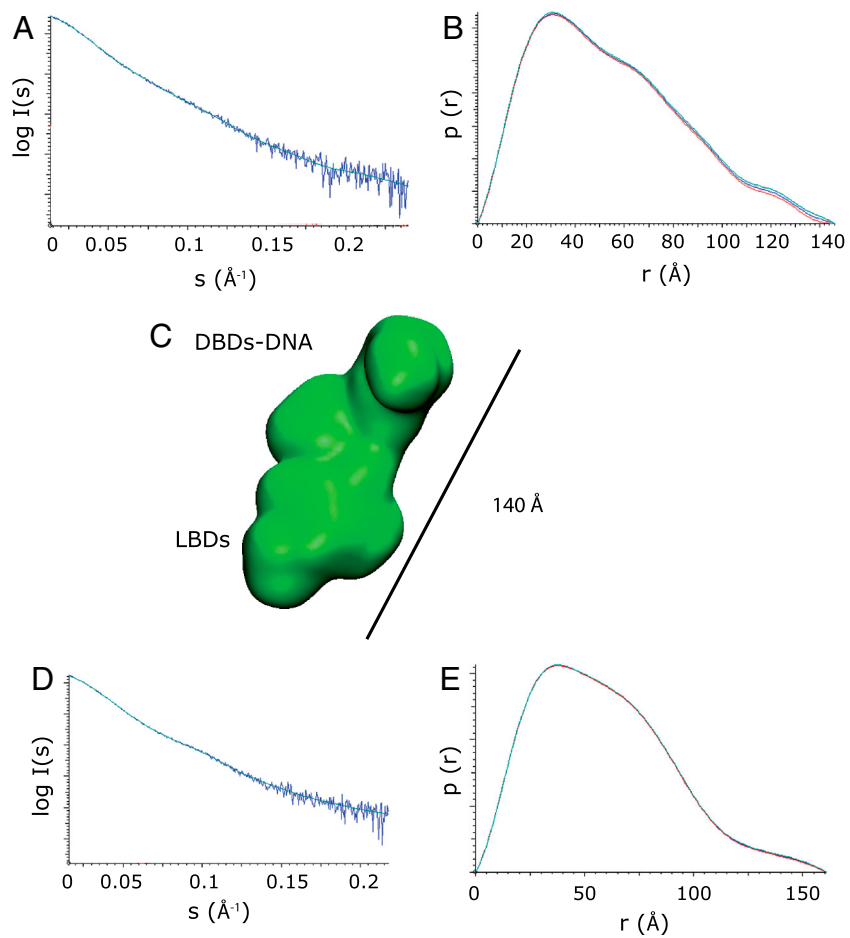

**Fig. S10.** Small angle X-ray scattering data. (A) Experimental scattering curve of RAR $\alpha\Delta$ ABF-RAR $\alpha\Delta$ ABF-DR5. (B) Pair distance distribution function  $P(r)$ . (C) Most typical ab initio envelope of RAR $\alpha\Delta$ ABF-RAR $\alpha\Delta$ ABF-DR5 generated by DAMMIN (beads model) shows two domains separated by a region larger than in the envelope of RXR $\alpha\Delta$ AB-RAR $\alpha\Delta$ ABF-DR5. Experimental scattering curve of RAR $\alpha\Delta$ AB-RAR $\alpha\Delta$ AB-DR5-SRC-2 RID. (D) Corresponding pair distance distribution function  $P(r)$ .

**Table S1. Crystallographic data and refinement statistics of crystal structures of 9cis-RA-RAR $\beta$  LBD-SRC-1 NR2, TTNPB-RAR $\beta$  LBD-SRC-1 NR2, RU100132-ER $\alpha$  LBD-SRC-1 NR2 complexes**

|                                             | RAR $\beta$ LBD                    |                                    | ER $\alpha$ LBD                                      |
|---------------------------------------------|------------------------------------|------------------------------------|------------------------------------------------------|
|                                             | 9-cis RA complex (4DM8)            | TTNPB complex (4DM6)               | RU100132 (4DMA)                                      |
| Data processing                             |                                    |                                    |                                                      |
| Space group                                 | $P2_12_12_1$                       | $P2_12_12_1$                       | $P2_1$                                               |
| Cell Dimensions ( $\text{\AA}$ ; $^\circ$ ) | $a = 58.48, b = 83.62, c = 108.78$ | $a = 58.09, b = 84.06, c = 102.14$ | $a = 56.282, b = 81.788, c = 58.303; \beta = 111.17$ |
| Resolution ( $\text{\AA}$ )                 | 20–2.3                             | 20–1.9                             | 30–2.3                                               |
| Completeness (last shell)                   | 95.6% (97.6%)                      | 98.4% (100%)                       | 96.6% (99.1%)                                        |
| Rsym (last shell)                           | 0.08 (0.28)                        | 0.07 (0.40)                        | 0.07 (0.12)                                          |
| $\langle I/\sigma(I) \rangle$ (last shell)  | 13.6 (7.4)                         | 27.2 (5.3)                         | 12.8 (7.9)                                           |
| Redundancy                                  | 4.1                                | 5.0                                | 3.1                                                  |
| Refinement statistics                       |                                    |                                    |                                                      |
| Rwork (no. of reflections)                  | 22.4% (21,814)                     | 20.6% (38,045)                     | 20.5% (18,877)                                       |
| Rfree (no. of reflections)                  | 27.7% (1,094)                      | 23.9% (2,003)                      | 25.1% (2,067)                                        |
| No. of protein atoms                        | 3,969                              | 3,922                              | 3,977                                                |
| No. of ligand atoms                         | 52                                 | 44                                 | 42                                                   |
| No. of solvent molecules                    | 128                                | 178                                | 120                                                  |
| rmsd bond length ( $\text{\AA}$ )           | 0.006                              | 0.01                               | 0.007                                                |
| rmsd bond angle ( $^\circ$ )                | 1.07                               | 1.08                               | 1.15                                                 |
| $\langle B \rangle$                         |                                    |                                    |                                                      |
| Protein M1(M2)                              | 52.8 (45.2)                        | 36.1 (29.9)                        | 31.9 (30.1)                                          |
| Ligand M1(M2)                               | 52.4 (50.0)                        | 37.7 (30.7)                        | 50.4 (50.7)                                          |
| CoA M1(M2)                                  | 64.3 (55.9)                        | 46.1 (33.7)                        | 42.5 (36.5)                                          |

Same buffer as described in *Methods*.

**Table S2. Elution volumes (mL) on S75 10/30 gel filtration column**

| Complexes                           | Elution volume (mL) |     |       |         |
|-------------------------------------|---------------------|-----|-------|---------|
|                                     | Complex             | CoA | Dimer | Monomer |
| RAR $\beta$ LBD apo                 |                     |     |       | 11.4    |
| RAR $\beta$ LBD-TTNPB               |                     |     |       | 11.5    |
| RAR $\beta$ LBD-TTNPB-SRC-1 NR2     |                     |     | 10.3  | 11.4    |
| SRC-1 RID                           |                     | 9.6 |       |         |
| SRC-2 RID                           |                     | 9.8 |       |         |
| RAR $\beta$ LBD-TTNPB-SRC-1 RID     | 8.8                 |     |       |         |
| RAR $\beta$ LBD-TTNPB+3eq SRC-2 RID | 8.7                 | 9.9 |       |         |
| RAR $\alpha$ LBD apo                |                     |     |       | 10 ;9   |
| RAR $\alpha$ LBD-9 cis RA           |                     |     |       | 11.0    |
| RAR $\alpha$ LBD -TTNPB-SRC-1 NR2   |                     |     | 10.0  | 10.9    |
| RAR $\alpha$ LBD-TTNPB-SRC-1 RID    | 8.7                 |     |       | 10.8    |
| RAR $\gamma$ LBD apo                |                     |     |       | 11.0    |
| RAR $\gamma$ LBD -at RA-SRC-1 NR2   |                     |     | 10.3  | 11.3    |
| RAR $\gamma$ LBD -atRA-SRC-1 RID    | 8.9                 |     |       | 11.1    |

**Table S3. Binding parameters derived from ITC measurements for SRC-1 NR2 (676-CPSSHSSLTERHKILHRLQEGSPS-700) peptide or SRC-2 RID to NR LBD**

|                                |           | N               | Kd ( $\mu\text{M}$ )            | $\Delta H$ (cal/mol) | $\Delta S$ (cal/mol/K) |
|--------------------------------|-----------|-----------------|---------------------------------|----------------------|------------------------|
| RAR $\alpha$ LBD               | SRC-1 NR2 | $1.87 \pm 0.01$ | $1.5 \pm 0.1$                   | $-3,150 \pm 20$      | 16.1                   |
|                                | SRC-2 RID | $0.83 \pm 0.02$ | $2.5 \pm 0.2$                   | $-14,900 \pm 400$    | -23.6                  |
| RAR $\alpha$ E393Q LBD         | SRC-1 NR2 | $2.3 \pm 0.04$  | $7 \pm 0.1$ (Kd1 = 3; Kd2 = 16) | $-6,240 \pm 170$     | 3.0                    |
|                                | SRC-2 RID | $0.78 \pm 0.02$ | $2.5 \pm 0.2$                   | $-28,000 \pm 500$    | -61                    |
| RXR $\alpha$ -RAR $\alpha$ LBD | SRC-2 RID | $0.81 \pm 0.01$ | $0.23 \pm 0.005$                | $-10,600 \pm 110$    | -22.7                  |
| ER $\alpha$ LBD                | SRC-2 RID | $0.95 \pm 0.01$ | $0.65 \pm 0.005$                | $-22,500 \pm 440$    | -45.9                  |
| ER $\alpha$ C530S LBD          | SRC-2 RID | $0.9 \pm 0.01$  | $0.26 \pm 0.005$                | $-35,500 \pm 900$    | -87                    |
| ER $\alpha$ C530S E523Q LBD    | SRC-2 RID | $0.88 \pm 0.02$ | $0.35 \pm 0.01$                 | $-53,100 \pm 1,700$  | -146                   |

The values for the affinity ( $K_d$ , dissociation constant) and enthalpy change ( $\Delta H$ ) accompanying the binding of SRC RID or NR2 peptide to NR LBD were obtained from the fit of a one-site model or two-site model, based on the binding of a ligand to a macromolecule using the law of mass action, to the corresponding ITC isotherms. N corresponds to the stoichiometry of the binding. Entropic contribution ( $T\Delta S$ ) to binding was calculated from the relationship  $T\Delta S = \Delta H - \Delta G$  with  $\Delta G = RT \ln K_d$ , where  $R$  is the universal molar gas constant (1.99 cal/mol/K) and  $T$  is the absolute temperature (K). Errors were calculated from at least three independent measurements. All errors are given to one standard deviation.

**Table S4. Small angle X-ray scattering parameters**

| Complexes                      | $R_g$ , Å | $D_{max}$ , Å |
|--------------------------------|-----------|---------------|
| RARΔAB/RXRΔAB/DR5              | 44 ± 0.5  | 150 ± 10      |
| RARΔAB/RARΔAB/DR5              | 43 ± 0.5  | 150 ± 10      |
| RARΔAB/RARΔAB/DR5/SRC-2-2 RID  | 46 ± 0.5  | 165 ± 10      |
| RARΔAB/RXRΔABm/DR5/SRC-2-2 RID | 50 ± 0.5  | 170 ± 10      |

$R_g$  and  $D_{max}$  are the radius of gyration and maximum size, respectively, calculated from the SAXS data. The forward scattering  $I(0)$  and the radii of gyration  $R_g$  were evaluated using the Guinier approximation (1), assuming that at very small angles ( $s < 1.3/R_g$ ) the intensity is represented as  $I(s) = I(0) \exp\{-(sR_g)^2/3\}$ .  $R_g$  and  $D_{max}$  were also computed from the entire scattering pattern using the indirect-transform package GNOM (2). Low resolution models were constructed ab initio using DAMMIN (3).

1. Guinier A (1939) Diffraction of X-rays of very small angles: Application to the study of ultramicroscopic phenomena. *Ann Phys* 12:161–237
2. Svergun DI (1992) Determination of the regularization parameter in indirect-transform methods using perceptual criteria. *J Appl Cryst* 25:495–503.
3. Svergun DI (1999) Restoring low resolution structure of biological macromolecules from solution scattering using simulated annealing. *Biophys J* 76:2879–2886.
